# Supplementary material for: Theoretical study of the interaction between HNZ (Z = O, S) and H2XNH2 (X = B, Al). Conventional and dihydrogen bonds
Source: Royal Society of Chemistry journal article supplement (doi:10.1039/b806346j), 2008-01-01
Supplement: b806346j.pdf [file b806346j.pdf]

Electronic Supplementary Material for PCCP

This journal is © The Owner Societies 2008

**Theoretical Study of the interaction between HNZ (Z = O, S) and H<sub>2</sub>XNH<sub>2</sub> (X = B, Al). Conventional and dihydrogen bonds.**

Nguyen Tien Trung<sup>2</sup>, Tran Thanh Hue<sup>2</sup>, Minh Tho Nguyen<sup>3</sup> and Thérèse Zeegers-Huyskens<sup>3\*</sup>

<sup>1</sup>Faculty of Chemistry, Quy Nhon University, 170 An Duong Vuong, Quy Nhon, Vietnam

<sup>2</sup>Faculty of Chemistry, Hanoi National University of Education, 136 Xuan Thuy, Hanoi, Vietnam

<sup>3</sup>Department of Chemistry, University of Leuven, Celestijnenlaan 200F, B-3001 Leuven, Belgium.

**Supporting Information**

**Cartesian coordinates and energies including ZPE correction of monomers and complexes at the MP2/6-311++G(2d,2p) level of theory**

| HNO                      | x         | y | z         |
|--------------------------|-----------|---|-----------|
| N                        | -0.582100 | 0 | 0.130603  |
| H                        | -0.563620 | 0 | 1.177304  |
| O                        | 0.579790  | 0 | -0.261441 |
| E(ZPE)= -130.215899 a.u. |           |   |           |

| HNS                      | x         | y | z         |
|--------------------------|-----------|---|-----------|
| N                        | -1.007702 | 0 | 0.288014  |
| H                        | -1.001878 | 0 | 1.313269  |
| S                        | 0.503487  | 0 | -0.208085 |
| E(ZPE)= -452.832032 a.u. |           |   |           |

| H <sub>2</sub> BNH <sub>2</sub> | x         | y | z         |
|---------------------------------|-----------|---|-----------|
| B                               | 0         | 0 | -0.780678 |
| N                               | 0         | 0 | 0.612996  |
| H                               | 0.840740  | 0 | 1.160627  |
| H                               | -0.840740 | 0 | 1.160627  |
| H                               | -1.041983 | 0 | -1.354417 |
| H                               | 1.041983  | 0 | -1.354417 |
| E(ZPE)= -81.775090 a.u.         |           |   |           |

Electronic Supplementary Material for PCCP  
This journal is © The Owner Societies 2008

| H <sub>2</sub> AlNH <sub>2</sub> | x         | y | z         |
|----------------------------------|-----------|---|-----------|
| Al                               | -0.547805 | 0 | -0.356823 |
| N                                | 0.942851  | 0 | 0.614143  |
| H                                | 0.976448  | 0 | 1.618904  |
| H                                | 1.875449  | 0 | 0.238730  |
| H                                | -0.405551 |   | -1.925197 |
| H                                | -1.924837 | 0 | 0.407257  |

E(ZPE)= -298.989477 a.u.

| H <sub>2</sub> NBH <sub>2</sub> •••HNO | x         | y | z         |
|----------------------------------------|-----------|---|-----------|
| H                                      | -0.840987 | 0 | 0.771610  |
| H                                      | -0.963502 | 0 | 2.456148  |
| H                                      | 1.539449  | 0 | 2.830535  |
| H                                      | 1.677211  | 0 | 0.757458  |
| N                                      | 0.250515  | 0 | -2.025123 |
| O                                      | -0.844795 | 0 | -1.466753 |
| H                                      | 0.981340  | 0 | -1.279292 |
| N                                      | -0.360060 | 0 | 1.654521  |
| B                                      | 1.026332  | 0 | 1.758355  |

E(ZPE)= -211.994762 a.u.

| H <sub>2</sub> NBH <sub>2</sub> •••HNS | x         | y | z         |
|----------------------------------------|-----------|---|-----------|
| H                                      | -0.507902 | 0 | 1.330046  |
| H                                      | -0.387013 | 0 | 3.013981  |
| H                                      | 2.141505  | 0 | 3.033811  |
| H                                      | 1.991340  | 0 | 0.962741  |
| N                                      | 0.523804  | 0 | -1.718048 |
| H                                      | 1.094249  | 0 | -0.865495 |
| N                                      | 0.096793  | 0 | 2.134636  |
| B                                      | 1.484435  | 0 | 2.043454  |
| S                                      | -1.006158 | 0 | -1.288029 |

E(ZPE)= -534.610915 a.u.

Electronic Supplementary Material for PCCP  
This journal is © The Owner Societies 2008

| H <sub>2</sub> NAIH <sub>2</sub> •••HNO | x         | y | z         |
|-----------------------------------------|-----------|---|-----------|
| H                                       | -1.466541 | 0 | 0.602501  |
| H                                       | -1.500602 | 0 | 2.258856  |
| H                                       | 1.651688  | 0 | 2.790171  |
| H                                       | 1.580619  | 0 | 0.023272  |
| N                                       | 0.131326  | 0 | -2.547660 |
| O                                       | -0.865269 | 0 | -1.829233 |
| H                                       | 0.963806  | 0 | -1.915237 |
| Al                                      | 0.859200  | 0 | 1.431280  |
| N                                       | -0.913672 | 0 | 1.443040  |

E(ZPE)= -429.208733 a.u.

| H <sub>2</sub> NAIH <sub>2</sub> •••HNS | x         | y | z         |
|-----------------------------------------|-----------|---|-----------|
| H                                       | -1.167784 | 0 | 1.159314  |
| H                                       | -1.112488 | 0 | 2.815764  |
| H                                       | 2.078838  | 0 | 3.161600  |
| H                                       | 1.812935  | 0 | 0.399658  |
| N                                       | 0.439512  | 0 | -2.234540 |
| H                                       | 1.020881  | 0 | -1.387665 |
| Al                                      | 1.200047  | 0 | 1.858010  |
| N                                       | -0.569976 | 0 | 1.969502  |
| S                                       | -1.082485 | 0 | -1.777970 |

E(ZPE)= -751.825188 a.u.
